# Supplementary material
Source: HighWire-hosted journal article supplement (https://gut.bmj.com/content/71/4/778)
Supplement: inline-supplementary-material-2 [file inline-supplementary-material-2.pdf]

**Supplementary Table S1.** Eligible observational cohort studies examining the association between NAFLD and incidence of different types of extra-hepatic tumours.

| Author, Year, Ref.                 | PMID     | Study characteristics (median or mean follow-up duration)                                       | Study country | Sample size (n) | NAFLD Individuals (n) | Modality of NAFLD diagnosis | Mean Age (years) | Male sex (n) | Mean BMI (kg/m <sup>2</sup> ) | Current smokers (n) | Patients with established diabetes (n) | Incident cases of extra-hepatic cancers at different sites (n)                                                                                                                                                        | Ascertainment of outcomes                                                                                                                                | Main results                                                                                                                                                                                                                                                                                                                                                                                                                                                                        | Covariate adjustment(s)                                                                                                                                                                          |
|------------------------------------|----------|-------------------------------------------------------------------------------------------------|---------------|-----------------|-----------------------|-----------------------------|------------------|--------------|-------------------------------|---------------------|----------------------------------------|-----------------------------------------------------------------------------------------------------------------------------------------------------------------------------------------------------------------------|----------------------------------------------------------------------------------------------------------------------------------------------------------|-------------------------------------------------------------------------------------------------------------------------------------------------------------------------------------------------------------------------------------------------------------------------------------------------------------------------------------------------------------------------------------------------------------------------------------------------------------------------------------|--------------------------------------------------------------------------------------------------------------------------------------------------------------------------------------------------|
| Longitudinal cohort studies (n=10) |          |                                                                                                 |               |                 |                       |                             |                  |              |                               |                     |                                        |                                                                                                                                                                                                                       |                                                                                                                                                          |                                                                                                                                                                                                                                                                                                                                                                                                                                                                                     |                                                                                                                                                                                                  |
| Lee et al. 2012                    | 21679251 | Retrospective cohort study (by health examination check-up program) (mean follow-up: 4.5 years) | South Korea   | 5,517           | 831                   | Ultrasound                  | 47               | 0            | 23                            | 161                 | 143 with type 2 diabetes               | 65 female patients developed colorectal adenomas; 15 female patients developed colorectal cancer                                                                                                                      | ICD-10 codes                                                                                                                                             | Women with NAFLD had a higher risk of incident colorectal adenomas (aHR 1.94, 95%CI 1.11-3.40) and colorectal cancer (aHR 3.08, 95%CI 1.02-9.34)                                                                                                                                                                                                                                                                                                                                    | Age, BMI, smoking, hypertension, dyslipidemia, impaired fasting glucose/diabetes                                                                                                                 |
| Huang et al. 2013                  | 23398678 | Retrospective cohort study (by health examination check-up program) (mean follow-up: 2.6 years) | Taiwan        | 1,522           | 619                   | Ultrasound                  | 54               | 913          | 24                            | 219                 | 94 with type 2 diabetes                | 216 patients developed colorectal adenomas (of whom 13 had advanced adenomas)                                                                                                                                         | Asymptomatic individuals with negative baseline colonoscopy who received consecutive self-paid health examinations and colonoscopy between 2003 and 2010 | Patients with NAFLD had a higher risk of incident colorectal adenomas (aHR 1.45, 95%CI 1.07-1.98)                                                                                                                                                                                                                                                                                                                                                                                   | Age, sex, BMI, smoking, hypertension, diabetes, MetS                                                                                                                                             |
| Sun et al. 2015                    | 26656334 | Retrospective cohort study (by national health Insurance program) (mean follow-up: 3.6 years)   | Taiwan        | 10,545          | 2,109                 | ICD-9 codes                 | 61               | 6,565        | NR (149 with obesity)         | NR                  | 1,699 with type 2 diabetes             | 15 patients developed uterine cancer; 9 patients developed thyroid cancer; 43 patients developed stomach cancer; 55 patients developed prostate cancer; 19 patients developed pancreas cancer; 102 patients developed | ICD-9 codes                                                                                                                                              | Patients with non-alcoholic cirrhosis had a higher risk of incident esophagus cancer (aHR 7.25, 95%CI 2.44-21.6), stomach cancer (aHR 5.50, 95%CI 2.78-10.9), colorectal cancer (aHR 2.58, 95%CI 1.59-4.18), but not a higher risk of incident thyroid cancer (aHR 1.97, 95%CI 0.34-11.5), lung cancer (aHR 1.54, 95%CI 0.85-2.80), uterine cancer (aHR 2.03, 95%CI 0.60-6.80), prostate cancer (aHR 1.58, 95%CI 0.73-3.44), urinary system cancers (aHR 1.60, 95%CI 0.69-3.72) and | Age, sex, obesity, hypertension, diabetes, dyslipidemia, viral hepatitis, and colon polyps, and diagnostic procedures of esophagogastroduodenoscopy, colonoscopy, abdomen CT, or ultrasonography |

|                    |          |                                                                                                   |             |        |       |                  |    |        |      |       |                            |                                                                                                                                                                                                                                                                                                          |                                                                           |                                                                                                                                                                                                                                                                                                                                                                                                                                                                                                                                                                                                       |                                                                                                                                                             |
|--------------------|----------|---------------------------------------------------------------------------------------------------|-------------|--------|-------|------------------|----|--------|------|-------|----------------------------|----------------------------------------------------------------------------------------------------------------------------------------------------------------------------------------------------------------------------------------------------------------------------------------------------------|---------------------------------------------------------------------------|-------------------------------------------------------------------------------------------------------------------------------------------------------------------------------------------------------------------------------------------------------------------------------------------------------------------------------------------------------------------------------------------------------------------------------------------------------------------------------------------------------------------------------------------------------------------------------------------------------|-------------------------------------------------------------------------------------------------------------------------------------------------------------|
|                    |          |                                                                                                   |             |        |       |                  |    |        |      |       |                            | lung cancer; 16 patients developed esophagus cancer; 105 patients developed colorectal cancer; 46 patients developed urinary system cancers                                                                                                                                                              |                                                                           | haematologic cancers (aHR 3.12, 95%CI 1.34-7.25)                                                                                                                                                                                                                                                                                                                                                                                                                                                                                                                                                      |                                                                                                                                                             |
| Yang et al. 2017   | 28777831 | Retrospective hospital-based cohort study (follow-up: up to 5 years)                              | South Korea | 1,023  | 441   | Ultrasound or CT | 55 | 522    | 25   | 226   | 127 with type 2 diabetes   | 298 developed colorectal adenomas                                                                                                                                                                                                                                                                        | Occurrence of colorectal tumours at 3 and 5 years after index colonoscopy | Patients with NAFLD had a higher risk of incident colorectal adenomas (aHR 1.31, 95%CI 1.01-1.71)                                                                                                                                                                                                                                                                                                                                                                                                                                                                                                     | Propensity score matching analysis<br>Age, sex, BMI, smoking, hypertension, diabetes, use of aspirin, lipid-lowering agents and imaging for NAFLD diagnosis |
| Kim GA et al. 2017 | 29150142 | Retrospective cohort study (by health examination check-up program) (median follow-up: 7.4 years) | South Korea | 25,947 | 8,721 | Ultrasound       | 48 | 13,966 | 24,5 | 5,067 | 2,174 with type 2 diabetes | 162 patients developed stomach cancer; 24 patients developed pancreas cancer; 118 patients developed male genital organ cancer; 83 patients developed lung cancer; 22 patients developed female genital organ cancer; 8 patients developed esophagus cancer; 76 patients developed colorectal cancer; 91 | Pathological and/or radiological confirmation                             | Patients with NAFLD had a higher risk of incident breast cancer (aHR 1.92, 95%CI 1.15-3.20), but not a higher risk of incident stomach cancer (aHR 0.98, 95%CI 0.69-1.38), esophagus cancer (aHR 1.93, 95%CI 0.48-7.72), colorectal cancer (aHR 1.45, 95%CI 0.88-2.38), pancreas cancer (aHR 1.16, 95%CI 0.51-2.65), male genital organ cancer (aHR 0.91, 95%CI 0.63-1.31), female genital organ cancer (aHR 2.06, 95%CI 0.86-4.91), lung cancer (aHR 1.34, 95%CI 0.87-2.07), kidney cancer (aHR 1.76, 95%CI 0.96-3.22), bladder cancer (aHR 1.93, 95%CI 0.94-3.95), non-Hodgkin lymphomas (aHR 0.94, | Age, sex, smoking hypertension, diabetes, lipids, GGT levels                                                                                                |

|                       |          |                                                                                              |       |                                                                           |       |                |    |       |    |       |                            |                                                                                                                                                                                                                                                           |                                                                                              |                                                                                                                                                                                                                                                                                                                                                                                                                                                                                                   |                                                                              |
|-----------------------|----------|----------------------------------------------------------------------------------------------|-------|---------------------------------------------------------------------------|-------|----------------|----|-------|----|-------|----------------------------|-----------------------------------------------------------------------------------------------------------------------------------------------------------------------------------------------------------------------------------------------------------|----------------------------------------------------------------------------------------------|---------------------------------------------------------------------------------------------------------------------------------------------------------------------------------------------------------------------------------------------------------------------------------------------------------------------------------------------------------------------------------------------------------------------------------------------------------------------------------------------------|------------------------------------------------------------------------------|
|                       |          |                                                                                              |       |                                                                           |       |                |    |       |    |       |                            | patients developed breast cancer; 42 patients developed kidney cancer; 30 patients developed bladder cancer; 49 patients developed non-Hodgkin lymphoma; 16 patients developed leukemias                                                                  |                                                                                              | 95%CI 0.52-1.70), and leukemias (1.16, 95%CI 0.42-3.19)                                                                                                                                                                                                                                                                                                                                                                                                                                           |                                                                              |
| Hamaguchi et al. 2019 | 31275587 | The NAGALA cohort study (by health examination check-up program) (mean follow-up: 6.5 years) | Japan | 27,944                                                                    | 3,211 | Ultrasound     | 45 | 8,585 | 25 | 3,457 | 299 with type 2 diabetes   | 48 patients developed stomach cancer; 52 patients developed colorectal cancer                                                                                                                                                                             | ICD-10 codes (subjects undergoing health check-ups for gastric cancer or colorectal cancers) | Patients with NAFLD had higher risk of incident stomach cancer (aHR 3.3, 95%CI 1.57-6.90) and colorectal cancer (aHR 3.04, 95%CI 1.47-6.30)                                                                                                                                                                                                                                                                                                                                                       | Age, sex, obesity, smoking, diabetes, physical activity, alcohol consumption |
| Allen et al. 2019     | 31470068 | Retrospective hospital-based matched cohort study (median follow-up: 8 years)                | USA   | 19,163 (4,722 with NAFLD and 14,441 individuals matched for age, and sex) | 4,722 | ICD-9/10 codes | 54 | 8,959 | 31 | 1,946 | 2,895 with type 2 diabetes | 202 patients developed uterine cancer; 30 patients developed stomach cancer; 581 patients developed prostate cancer; 72 patients developed pancreas cancer; 69 patients developed ovary cancer; 238 patients developed lung cancer; 29 patients developed | ICD-9/10 codes                                                                               | Patients with NAFLD had higher risk of incident uterine cancer (aHR 2.40, 95%CI 1.40-4.10), stomach cancer (aHR 2.30, 95%CI 1.30-4.10), prostate cancer (aHR 1.60, 95%CI 1.00-2.50), pancreas cancer (aHR 2.00, 95%CI 1.20-3.30), ovary cancer (aHR 1.70, 95%CI 1.05-3.00), colorectal cancer (aHR 1.80, 95%CI 1.10-2.80) and breast cancer (aHR 1.60, 95%CI 1.05-2.60), but not higher risk of incident lung cancer (aHR 1.40, 95%CI 0.50-2.40) and esophagus cancer (aHR 1.70, 95%CI 0.80-2.70) | Age, sex, and obesity                                                        |

|                      |          |                                                                                                 |       |        |        |            |    |        |                         |        |                            |                                                                                                                                                                                                                                                                                                                                                     |                                                                                                                                                 |                                                                                                                                                                                                                                                                                                                                                                                    |                                                                                                                                                |
|----------------------|----------|-------------------------------------------------------------------------------------------------|-------|--------|--------|------------|----|--------|-------------------------|--------|----------------------------|-----------------------------------------------------------------------------------------------------------------------------------------------------------------------------------------------------------------------------------------------------------------------------------------------------------------------------------------------------|-------------------------------------------------------------------------------------------------------------------------------------------------|------------------------------------------------------------------------------------------------------------------------------------------------------------------------------------------------------------------------------------------------------------------------------------------------------------------------------------------------------------------------------------|------------------------------------------------------------------------------------------------------------------------------------------------|
|                      |          |                                                                                                 |       |        |        |            |    |        |                         |        |                            | esophagus cancer; 276 patients developed colorectal cancer; 676 patients developed breast cancer                                                                                                                                                                                                                                                    |                                                                                                                                                 |                                                                                                                                                                                                                                                                                                                                                                                    |                                                                                                                                                |
| Wang et al. 2020     | 32407969 | Retrospective cohort study (by health examination check-up program) (follow-up: up to 10 years) | China | 54,187 | 17,528 | Ultrasound | 53 | 54,187 | NR (3,385 with obesity) | 17,117 | 5,597 with type 2 diabetes | 58 male patients developed stomach cancer; 8 male patients developed small intestine cancer; 29 male patients developed prostate cancer; 208 male patients developed lung cancer; 29 developed esophagus cancer; 95 male patients developed colorectal cancer; 114 male patients developed kidney cancer, 96 male patients developed bladder cancer | Self-reported information through questionnaires in the every 2-year routine follow-up and by linkage with the provincial vital statistics data | Men with NAFLD had higher risk of incident lung cancer (aHR 1.23, 95%CI 1.02-1.49), but not stomach cancer (aHR 1.01, 95%CI 0.71-1.43), small intestine cancer (aHR 1.68, 95%CI 0.73-3.84), esophagus cancer (aHR 1.45, 95%CI 0.77-2.73), colorectal cancer (aHR 1.22, 95%CI 0.91-1.64), kidney cancer (aHR 1.46, 95%CI 0.96-2.21), and bladder cancer (aHR 1.04, 95%CI 0.61-1.75) | Age, BMI, physical activity, smoking, diabetes, hypertension, alcohol consumption, education level, serum ALT, lipids, C-reactive protein      |
| Yamamoto et al. 2020 | 33201570 | Retrospective cohort study (by health examination check-up program) (follow-up: up to 14 years) | Japan | 30,172 | 4,394  | Ultrasound | 44 | 9,517  | 22                      | 3,415  | 663 with type 2 diabetes   | 226 patients developed stomach cancer; 15 patients developed small intestine cancer; 13 patients developed                                                                                                                                                                                                                                          | ICD-10 codes and/or participant questionnaires                                                                                                  | Patients with NAFLD had higher risk of incident stomach cancer (aHR 1.40, 95%CI 1.02-1.94), and lung cancer (aHR 1.34, 95%CI 1.07-1.67), but not small intestine cancer (aHR 2.80, 95%CI 0.87-8.96), rectum cancer (aHR                                                                                                                                                            | Age, sex, BMI, smoking, dyslipidemia, diabetes, thyroid dysfunction, hypertension, sleep apnea, chronic kidney disease, cardiovascular disease |

|                    |          |                                                                       |             |       |       |            |    |       |    |       |    |                                                                                                                                                                                                                                                                                     |             |                                                                                                                                                                                                                                                                                                                                                               |                                                                                                                        |
|--------------------|----------|-----------------------------------------------------------------------|-------------|-------|-------|------------|----|-------|----|-------|----|-------------------------------------------------------------------------------------------------------------------------------------------------------------------------------------------------------------------------------------------------------------------------------------|-------------|---------------------------------------------------------------------------------------------------------------------------------------------------------------------------------------------------------------------------------------------------------------------------------------------------------------------------------------------------------------|------------------------------------------------------------------------------------------------------------------------|
|                    |          |                                                                       |             |       |       |            |    |       |    |       |    | rectum cancer; 219 patients developed male genital organ cancer; 206 patients developed lung cancer; 250 patients developed female genital organ cancer; 43 patients developed esophagus cancer; 560 patients developed breast cancer; 86 patients developed urinary system cancers |             | 0.69, 95%CI 0.15-3.30), male genital organ cancer (aHR 0.75, 95%CI 0.52-1.07), female genital organ cancer (aHR 1.03, 95%CI 0.69-1.54), esophagus cancer (aHR 1.40, 95%CI 0.71-2.78), breast cancer (aHR 1.22, 95%CI 0.94-1.59), and urinary system cancers (aHR 0.86, 95%CI 0.50-1.47)                                                                       |                                                                                                                        |
| Kim NH et al. 2020 | 32630984 | Retrospective hospital-based cohort study (mean follow-up: 3.5 years) | South Korea | 6,182 | 2,642 | Ultrasound | 44 | 4,659 | 24 | 3,051 | NR | 1,999 patients developed cancer or any adenoma; 144 patients developed cancer or advanced adenoma                                                                                                                                                                                   | Colonoscopy | Patients with NAFLD had a higher risk of developing metachronous colorectal cancer or any adenoma (men: aHR 1.17, 95%CI 1.06-1.29; women: aHR 1.63, 95%CI 1.27-2.07). In addition, NAFLD was an independent predictor for metachronous colorectal cancer or advanced adenoma in women (aHR 2.61, 95%CI 1.27-5.37), but not in men (aHR 0.97, 95%CI 0.66-1.42) | Age, sex, smoking family history of colorectal cancer, regular exercise, baseline adenoma characteristics, medications |

**Abbreviations:** ALT, alanine aminotransferase; aHR, adjusted hazard ratio; aOR, adjusted odds ratio; BMI, body mass index; CI, confidence interval; CT, computed tomography; GGT, gamma-glutamyltransferase; ICD, international classification of diseases; MetS, metabolic syndrome; NAFLD, non-alcoholic fatty liver disease; NASH, non-alcoholic steatohepatitis; NR, not reported.
