# Supplementary material
Source: HighWire-hosted journal article supplement (https://gut.bmj.com/content/71/4/778)
Supplement: inline-supplementary-material-3 [file inline-supplementary-material-3.pdf]

**Supplementary Table S2.** Studies excluded at the eligibility step of PRISMA diagram.

| Author, Year       | PMID     | Reason(s) for exclusion           |
|--------------------|----------|-----------------------------------|
| Arase et al. 2012  | 22175908 | Unsatisfactory inclusion criteria |
| Kodama et al. 2013 | 23320802 | Unsatisfactory inclusion criteria |
| Choi et al. 2014   | 24481324 | Unsatisfactory outcome            |
| Nseir et al. 2017  | 28480679 | Unsatisfactory study design       |
| Chang et al. 2018  | 29235054 | Unsatisfactory study design       |
| Choi et al. 2018   | 30231041 | Unsatisfactory inclusion criteria |
| Park et al. 2020   | 32192863 | Unsatisfactory inclusion criteria |
| Lee et al. 2020    | 31978054 | Unsatisfactory inclusion criteria |
