# Supplementary material
Source: HighWire-hosted journal article supplement (https://gut.bmj.com/content/71/4/778)
Supplement: inline-supplementary-material-4 [file inline-supplementary-material-4.pdf]

**Supplementary Table S3.** Syntax used through database searching on PubMed, Scopus or Web of Science.**PubMed <up to December 30, 2020>**

|     |                                                                                   |     |
|-----|-----------------------------------------------------------------------------------|-----|
| #1  | Search "nonalcoholic fatty liver disease AND esophagus cancer" IN "humans"        | 33  |
| #2  | Search "fatty liver AND esophagus cancer" IN "humans"                             | 61  |
| #3  | Search "NAFLD AND esophagus cancer" IN "humans"                                   | 24  |
| #4  | Search "nonalcoholic steatohepatitis AND esophagus cancer" IN "humans"            | 30  |
| #5  | Search "NASH AND esophagus cancer" IN "humans"                                    | 28  |
| #6  | Search "nonalcoholic fatty liver disease AND stomach cancer" IN "humans"          | 14  |
| #7  | Search "fatty liver AND stomach cancer" IN "humans"                               | 81  |
| #8  | Search "NAFLD AND stomach cancer" IN "humans"                                     | 11  |
| #9  | Search "nonalcoholic steatohepatitis AND stomach cancer" IN "humans"              | 12  |
| #10 | Search "NASH AND stomach cancer" IN "humans"                                      | 27  |
| #11 | Search "nonalcoholic fatty liver disease AND pancreas cancer" IN "humans"         | 70  |
| #12 | Search "fatty liver AND pancreas cancer" IN "humans"                              | 251 |
| #13 | Search "NAFLD AND pancreas cancer" IN "humans"                                    | 61  |
| #14 | Search "nonalcoholic steatohepatitis AND pancreas cancer" IN "humans"             | 68  |
| #15 | Search "NASH AND pancreas cancer" IN "humans"                                     | 33  |
| #16 | Search "nonalcoholic fatty liver disease AND colorectal cancer" IN "humans"       | 106 |
| #17 | Search "fatty liver AND colorectal cancer" IN "humans"                            | 327 |
| #18 | Search "NAFLD AND colorectal cancer" IN "humans"                                  | 96  |
| #19 | Search "nonalcoholic steatohepatitis AND colorectal cancer" IN "humans"           | 110 |
| #20 | Search "NASH AND colorectal cancer" IN "humans"                                   | 168 |
| #21 | Search "nonalcoholic fatty liver disease AND colorectal adenomas" IN "humans"     | 24  |
| #22 | Search "fatty liver AND colorectal adenomas" IN "humans"                          | 37  |
| #23 | Search "NAFLD AND colorectal adenomas" IN "humans"                                | 21  |
| #24 | Search "nonalcoholic steatohepatitis AND colorectal adenomas" IN "humans"         | 22  |
| #25 | Search "NASH AND colorectal adenomas" IN "humans"                                 | 5   |
| #26 | Search "nonalcoholic fatty liver disease AND gastrointestinal cancer" IN "humans" | 225 |
| #27 | Search "fatty liver AND gastrointestinal cancer" IN "humans"                      | 452 |
| #28 | Search "NAFLD AND gastrointestinal cancer" IN "humans"                            | 191 |
| #29 | Search "nonalcoholic steatohepatitis AND gastrointestinal cancer" IN "humans"     | 211 |
| #30 | Search "NASH AND gastrointestinal cancer" IN "humans"                             | 209 |

|     |                                                                                       |     |
|-----|---------------------------------------------------------------------------------------|-----|
| #31 | Search "nonalcoholic fatty liver disease AND lung cancer" IN "humans"                 | 26  |
| #32 | Search "fatty liver AND lung cancer" IN "humans"                                      | 148 |
| #33 | Search "NAFLD AND lung cancer" IN "humans"                                            | 21  |
| #34 | Search "nonalcoholic steatohepatitis AND lung cancer" IN "humans"                     | 23  |
| #35 | Search "NASH AND lung cancer" IN "humans"                                             | 79  |
| #36 | Search "nonalcoholic fatty liver disease AND thyroid cancer" IN "humans"              | 11  |
| #37 | Search "fatty liver AND thyroid cancer" IN "humans"                                   | 39  |
| #38 | Search "NAFLD AND thyroid cancer" IN "humans"                                         | 11  |
| #39 | Search "nonalcoholic steatohepatitis AND thyroid cancer" IN "humans"                  | 12  |
| #40 | Search "NASH AND thyroid cancer" IN "humans"                                          | 7   |
| #41 | Search "nonalcoholic fatty liver disease AND breast cancer" IN "humans"               | 40  |
| #42 | Search "fatty liver AND breast cancer" IN "humans"                                    | 206 |
| #43 | Search "NAFLD AND breast cancer" IN "humans"                                          | 37  |
| #44 | Search "nonalcoholic steatohepatitis AND breast cancer" IN "humans"                   | 49  |
| #45 | Search "NASH AND breast cancer" IN "humans"                                           | 146 |
| #46 | Search "nonalcoholic fatty liver disease AND female genital organ cancer" IN "humans" | 5   |
| #47 | Search "fatty liver AND female genital organ cancer" IN "humans"                      | 13  |
| #48 | Search "NAFLD AND female genital organ cancer" IN "humans"                            | 5   |
| #49 | Search "nonalcoholic steatohepatitis AND female genital organ cancer" IN "humans"     | 6   |
| #50 | Search "NASH AND female genital organ cancer" IN "humans"                             | 11  |
| #51 | Search "nonalcoholic fatty liver disease AND gynecological cancer" IN "humans"        | 31  |
| #52 | Search "fatty liver AND gynecological cancer" IN "humans"                             | 42  |
| #53 | Search "NAFLD AND gynecological cancer" IN "humans"                                   | 29  |
| #54 | Search "nonalcoholic steatohepatitis AND gynecological cancer" IN "humans"            | 29  |
| #55 | Search "NASH AND gynecological cancer" IN "humans"                                    | 47  |
| #56 | Search "nonalcoholic fatty liver disease AND prostate cancer" IN "humans"             | 12  |
| #57 | Search "fatty liver AND prostate cancer" IN "humans"                                  | 74  |
| #58 | Search "NAFLD AND prostate cancer" IN "humans"                                        | 11  |
| #59 | Search "nonalcoholic steatohepatitis AND prostate cancer" IN "humans"                 | 10  |
| #60 | Search "NASH AND prostate cancer" IN "humans"                                         | 42  |
| #61 | Search "nonalcoholic fatty liver disease AND kidney cancer" IN "humans"               | 75  |
| #62 | Search "fatty liver AND kidney cancer" IN "humans"                                    | 185 |

|     |                                                                                |    |
|-----|--------------------------------------------------------------------------------|----|
| #63 | Search "NAFLD AND kidney cancer" IN "humans"                                   | 68 |
| #64 | Search "nonalcoholic steatohepatitis AND kidney cancer" IN "humans"            | 78 |
| #65 | Search "NASH AND kidney cancer" IN "humans"                                    | 45 |
| #66 | Search "nonalcoholic fatty liver disease AND hematological cancer" IN "humans" | 27 |
| #67 | Search "fatty liver AND hematological cancer" IN "humans"                      | 71 |
| #68 | Search "NAFLD AND hematological cancer" IN "humans"                            | 26 |
| #69 | Search "nonalcoholic steatohepatitis AND hematological cancer" IN "humans"     | 29 |
| #70 | Search "NASH AND hematological cancer" IN "humans"                             | 32 |

**Scopus <up to December 30, 2020>**

|     |                                                                               |     |
|-----|-------------------------------------------------------------------------------|-----|
| #1  | Search "nonalcoholic fatty liver disease AND esophagus cancer" IN "humans"    | 37  |
| #2  | Search "fatty liver AND esophagus cancer" IN "humans"                         | 101 |
| #3  | Search "NAFLD AND esophagus cancer" IN "humans"                               | 16  |
| #4  | Search "nonalcoholic steatohepatitis AND esophagus cancer" IN "humans"        | 20  |
| #5  | Search "NASH AND esophagus cancer" IN "humans"                                | 6   |
| #6  | Search "nonalcoholic fatty liver disease AND stomach cancer" IN "humans"      | 45  |
| #7  | Search "fatty liver AND stomach cancer" IN "humans"                           | 147 |
| #8  | Search "NAFLD AND stomach cancer" IN "humans"                                 | 29  |
| #9  | Search "nonalcoholic steatohepatitis AND stomach cancer" IN "humans"          | 30  |
| #10 | Search "NASH AND stomach cancer" IN "humans"                                  | 14  |
| #11 | Search "nonalcoholic fatty liver disease AND pancreas cancer" IN "humans"     | 83  |
| #12 | Search "fatty liver AND pancreas cancer" IN "humans"                          | 137 |
| #13 | Search "NAFLD AND pancreas cancer" IN "humans"                                | 49  |
| #14 | Search "nonalcoholic steatohepatitis AND pancreas cancer" IN "humans"         | 15  |
| #15 | Search "NASH AND pancreas cancer" IN "humans"                                 | 10  |
| #16 | Search "nonalcoholic fatty liver disease AND colorectal cancer" IN "humans"   | 126 |
| #17 | Search "fatty liver AND colorectal cancer" IN "humans"                        | 447 |
| #18 | Search "NAFLD AND colorectal cancer" IN "humans"                              | 52  |
| #19 | Search "nonalcoholic steatohepatitis AND colorectal cancer" IN "humans"       | 37  |
| #20 | Search "NASH AND colorectal cancer" IN "humans"                               | 26  |
| #21 | Search "nonalcoholic fatty liver disease AND colorectal adenomas" IN "humans" | 63  |
| #22 | Search "fatty liver AND colorectal adenomas" IN "humans"                      | 56  |

|     |                                                                                       |     |
|-----|---------------------------------------------------------------------------------------|-----|
| #23 | Search "NAFLD AND colorectal adenomas" IN "humans"                                    | 36  |
| #24 | Search "nonalcoholic steatohepatitis AND colorectal adenomas" IN "humans"             | 13  |
| #25 | Search "NASH AND colorectal adenomas" IN "humans"                                     | 6   |
| #26 | Search "nonalcoholic fatty liver disease AND gastrointestinal cancer" IN "humans"     | 119 |
| #27 | Search "fatty liver AND gastrointestinal cancer" IN "humans"                          | 218 |
| #28 | Search "NAFLD AND gastrointestinal cancer" IN "humans"                                | 70  |
| #29 | Search "nonalcoholic steatohepatitis AND gastrointestinal cancer" IN "humans"         | 77  |
| #30 | Search "NASH AND gastrointestinal cancer" IN "humans"                                 | 43  |
| #31 | Search "nonalcoholic fatty liver disease AND lung cancer" IN "humans"                 | 94  |
| #32 | Search "fatty liver AND lung cancer" IN "humans"                                      | 271 |
| #33 | Search "NAFLD AND lung cancer" IN "humans"                                            | 29  |
| #34 | Search "nonalcoholic steatohepatitis AND lung cancer" IN "humans"                     | 55  |
| #35 | Search "NASH AND lung cancer" IN "humans"                                             | 20  |
| #36 | Search "nonalcoholic fatty liver disease AND thyroid cancer" IN "humans"              | 18  |
| #37 | Search "fatty liver AND thyroid cancer" IN "humans"                                   | 57  |
| #38 | Search "NAFLD AND thyroid cancer" IN "humans"                                         | 16  |
| #39 | Search "nonalcoholic steatohepatitis AND thyroid cancer" IN "humans"                  | 11  |
| #40 | Search "NASH AND thyroid cancer" IN "humans"                                          | 7   |
| #41 | Search "nonalcoholic fatty liver disease AND breast cancer" IN "humans"               | 99  |
| #42 | Search "fatty liver AND breast cancer" IN "humans"                                    | 294 |
| #43 | Search "NAFLD AND breast cancer" IN "humans"                                          | 59  |
| #44 | Search "nonalcoholic steatohepatitis AND breast cancer" IN "humans"                   | 29  |
| #45 | Search "NASH AND breast cancer" IN "humans"                                           | 26  |
| #46 | Search "nonalcoholic fatty liver disease AND female genital organ cancer" IN "humans" | 1   |
| #47 | Search "fatty liver AND female genital organ cancer" IN "humans"                      | 5   |
| #48 | Search "NAFLD AND female genital organ cancer" IN "humans"                            | 0   |
| #49 | Search "nonalcoholic steatohepatitis AND female genital organ cancer" IN "humans"     | 0   |
| #50 | Search "NASH AND female genital organ cancer" IN "humans"                             | 0   |
| #51 | Search "nonalcoholic fatty liver disease AND gynecological cancer" IN "humans"        | 1   |
| #52 | Search "fatty liver AND gynecological cancer" IN "humans"                             | 10  |
| #53 | Search "NAFLD AND gynecological cancer" IN "humans"                                   | 0   |
| #54 | Search "nonalcoholic steatohepatitis AND gynecological cancer" IN "humans"            | 1   |

|     |                                                                                |     |
|-----|--------------------------------------------------------------------------------|-----|
| #55 | Search "NASH AND gynecological cancer" IN "humans"                             | 0   |
| #56 | Search "nonalcoholic fatty liver disease AND prostate cancer" IN "humans"      | 33  |
| #57 | Search "fatty liver AND prostate cancer" IN "humans"                           | 106 |
| #58 | Search "NAFLD AND prostate cancer" IN "humans"                                 | 28  |
| #59 | Search "nonalcoholic steatohepatitis AND prostate cancer" IN "humans"          | 32  |
| #60 | Search "NASH AND prostate cancer" IN "humans"                                  | 18  |
| #61 | Search "nonalcoholic fatty liver disease AND kidney cancer" IN "humans"        | 104 |
| #62 | Search "fatty liver AND kidney cancer" IN "humans"                             | 285 |
| #63 | Search "NAFLD AND kidney cancer" IN "humans"                                   | 56  |
| #64 | Search "nonalcoholic steatohepatitis AND kidney cancer" IN "humans"            | 57  |
| #65 | Search "NASH AND kidney cancer" IN "humans"                                    | 33  |
| #66 | Search "nonalcoholic fatty liver disease AND hematological cancer" IN "humans" | 14  |
| #67 | Search "fatty liver AND hematological cancer" IN "humans"                      | 47  |
| #68 | Search "NAFLD AND hematological cancer" IN "humans"                            | 2   |
| #69 | Search "nonalcoholic steatohepatitis AND hematological cancer" IN "humans"     | 2   |
| #70 | Search "NASH AND hematological cancer" IN "humans"                             | 1   |

**Web of Science <up to December 30, 2020>**

|     |                                                                            |     |
|-----|----------------------------------------------------------------------------|-----|
| #1  | Search "nonalcoholic fatty liver disease AND esophagus cancer" IN "humans" | 9   |
| #2  | Search "fatty liver AND esophagus cancer" IN "humans"                      | 25  |
| #3  | Search "NAFLD AND esophagus cancer" IN "humans"                            | 6   |
| #4  | Search "nonalcoholic steatohepatitis AND esophagus cancer" IN "humans"     | 9   |
| #5  | Search "NASH AND esophagus cancer" IN "humans"                             | 0   |
| #6  | Search "nonalcoholic fatty liver disease AND stomach cancer" IN "humans"   | 7   |
| #7  | Search "fatty liver AND stomach cancer" IN "humans"                        | 54  |
| #8  | Search "NAFLD AND stomach cancer" IN "humans"                              | 8   |
| #9  | Search "nonalcoholic steatohepatitis AND stomach cancer" IN "humans"       | 2   |
| #10 | Search "NASH AND stomach cancer" IN "humans"                               | 2   |
| #11 | Search "nonalcoholic fatty liver disease AND pancreas cancer" IN "humans"  | 7   |
| #12 | Search "fatty liver AND pancreas cancer" IN "humans"                       | 118 |
| #13 | Search "NAFLD AND pancreas cancer" IN "humans"                             | 14  |
| #14 | Search "nonalcoholic steatohepatitis AND pancreas cancer" IN "humans"      | 3   |

|     |                                                                                       |     |
|-----|---------------------------------------------------------------------------------------|-----|
| #15 | Search "NASH AND pancreas cancer" IN "humans"                                         | 5   |
| #16 | Search "nonalcoholic fatty liver disease AND colorectal cancer" IN "humans"           | 105 |
| #17 | Search "fatty liver AND colorectal cancer" IN "humans"                                | 302 |
| #18 | Search "NAFLD AND colorectal cancer" IN "humans"                                      | 96  |
| #19 | Search "nonalcoholic steatohepatitis AND colorectal cancer" IN "humans"               | 80  |
| #20 | Search "NASH AND colorectal cancer" IN "humans"                                       | 34  |
| #21 | Search "nonalcoholic fatty liver disease AND colorectal adenomas" IN "humans"         | 25  |
| #22 | Search "fatty liver AND colorectal adenomas" IN "humans"                              | 70  |
| #23 | Search "NAFLD AND colorectal adenomas" IN "humans"                                    | 30  |
| #24 | Search "nonalcoholic steatohepatitis AND colorectal adenomas" IN "humans"             | 6   |
| #25 | Search "NASH AND colorectal adenomas" IN "humans"                                     | 4   |
| #26 | Search "nonalcoholic fatty liver disease AND gastrointestinal cancer" IN "humans"     | 49  |
| #27 | Search "fatty liver AND gastrointestinal cancer" IN "humans"                          | 184 |
| #28 | Search "NAFLD AND gastrointestinal cancer" IN "humans"                                | 34  |
| #29 | Search "nonalcoholic steatohepatitis AND gastrointestinal cancer" IN "humans"         | 36  |
| #30 | Search "NASH AND gastrointestinal cancer" IN "humans"                                 | 14  |
| #31 | Search "nonalcoholic fatty liver disease AND lung cancer" IN "humans"                 | 31  |
| #32 | Search "fatty liver AND lung cancer" IN "humans"                                      | 283 |
| #33 | Search "NAFLD AND lung cancer" IN "humans"                                            | 25  |
| #34 | Search "nonalcoholic steatohepatitis AND lung cancer" IN "humans"                     | 25  |
| #35 | Search "NASH AND lung cancer" IN "humans"                                             | 17  |
| #36 | Search "nonalcoholic fatty liver disease AND thyroid cancer" IN "humans"              | 14  |
| #37 | Search "fatty liver AND thyroid cancer" IN "humans"                                   | 65  |
| #38 | Search "NAFLD AND thyroid cancer" IN "humans"                                         | 11  |
| #39 | Search "nonalcoholic steatohepatitis AND thyroid cancer" IN "humans"                  | 12  |
| #40 | Search "NASH AND thyroid cancer" IN "humans"                                          | 3   |
| #41 | Search "nonalcoholic fatty liver disease AND breast cancer" IN "humans"               | 104 |
| #42 | Search "fatty liver AND breast cancer" IN "humans"                                    | 74  |
| #43 | Search "NAFLD AND breast cancer" IN "humans"                                          | 70  |
| #44 | Search "nonalcoholic steatohepatitis AND breast cancer" IN "humans"                   | 74  |
| #45 | Search "NASH AND breast cancer" IN "humans"                                           | 51  |
| #46 | Search "nonalcoholic fatty liver disease AND female genital organ cancer" IN "humans" | 0   |

|     |                                                                                   |     |
|-----|-----------------------------------------------------------------------------------|-----|
| #47 | Search "fatty liver AND female genital organ cancer" IN "humans"                  | 0   |
| #48 | Search "NAFLD AND female genital organ cancer" IN "humans"                        | 0   |
| #49 | Search "nonalcoholic steatohepatitis AND female genital organ cancer" IN "humans" | 0   |
| #50 | Search "NASH AND female genital organ cancer" IN "humans"                         | 0   |
| #51 | Search "nonalcoholic fatty liver disease AND gynecological cancer" IN "humans"    | 0   |
| #52 | Search "fatty liver AND gynecological cancer" IN "humans"                         | 2   |
| #53 | Search "NAFLD AND gynecological cancer" IN "humans"                               | 0   |
| #54 | Search "nonalcoholic steatohepatitis AND gynecological cancer" IN "humans"        | 0   |
| #55 | Search "NASH AND gynecological cancer" IN "humans"                                | 0   |
| #56 | Search "nonalcoholic fatty liver disease AND prostate cancer" IN "humans"         | 34  |
| #57 | Search "fatty liver AND prostate cancer" IN "humans"                              | 219 |
| #58 | Search "NAFLD AND prostate cancer" IN "humans"                                    | 31  |
| #59 | Search "nonalcoholic steatohepatitis AND prostate cancer" IN "humans"             | 21  |
| #60 | Search "NASH AND prostate cancer" IN "humans"                                     | 16  |
| #61 | Search "nonalcoholic fatty liver disease AND kidney cancer" IN "humans"           | 36  |
| #62 | Search "fatty liver AND kidney cancer" IN "humans"                                | 184 |
| #63 | Search "NAFLD AND kidney cancer" IN "humans"                                      | 37  |
| #64 | Search "nonalcoholic steatohepatitis AND kidney cancer" IN "humans"               | 22  |
| #65 | Search "NASH AND kidney cancer" IN "humans"                                       | 15  |
| #66 | Search "nonalcoholic fatty liver disease AND hematological cancer" IN "humans"    | 4   |
| #67 | Search "fatty liver AND hematological cancer" IN "humans"                         | 17  |
| #68 | Search "NAFLD AND hematological cancer" IN "humans"                               | 3   |
| #69 | Search "nonalcoholic steatohepatitis AND hematological cancer" IN "humans"        | 6   |
| #70 | Search "NASH AND hematological cancer" IN "humans"                                | 1   |
