# Supplementary material
Source: HighWire-hosted journal article supplement (https://gut.bmj.com/content/71/4/778)

Panel A

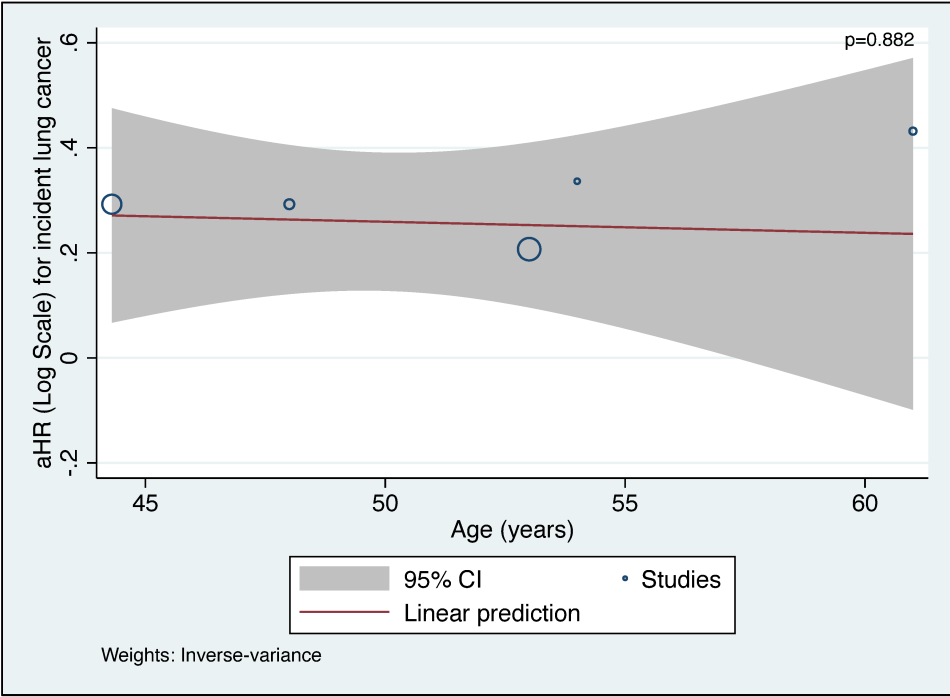

Panel B

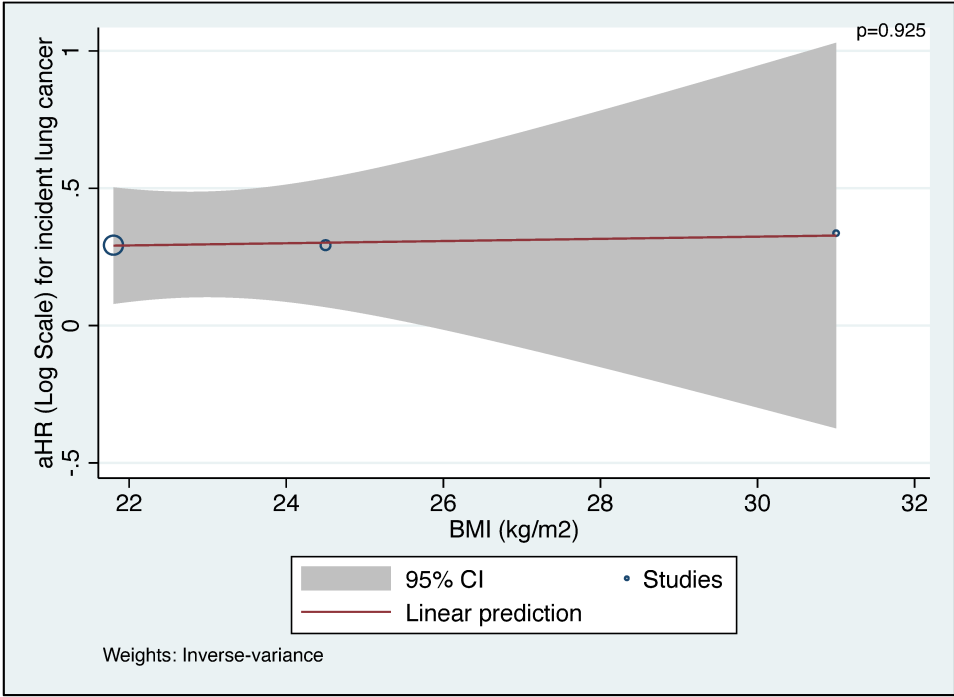

Panel C

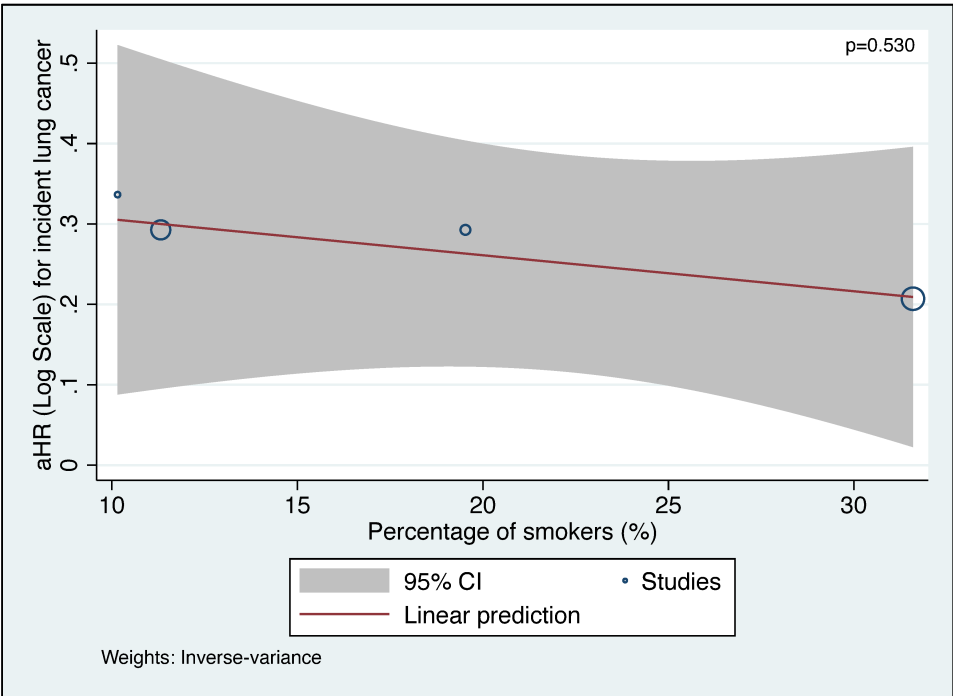

Panel D

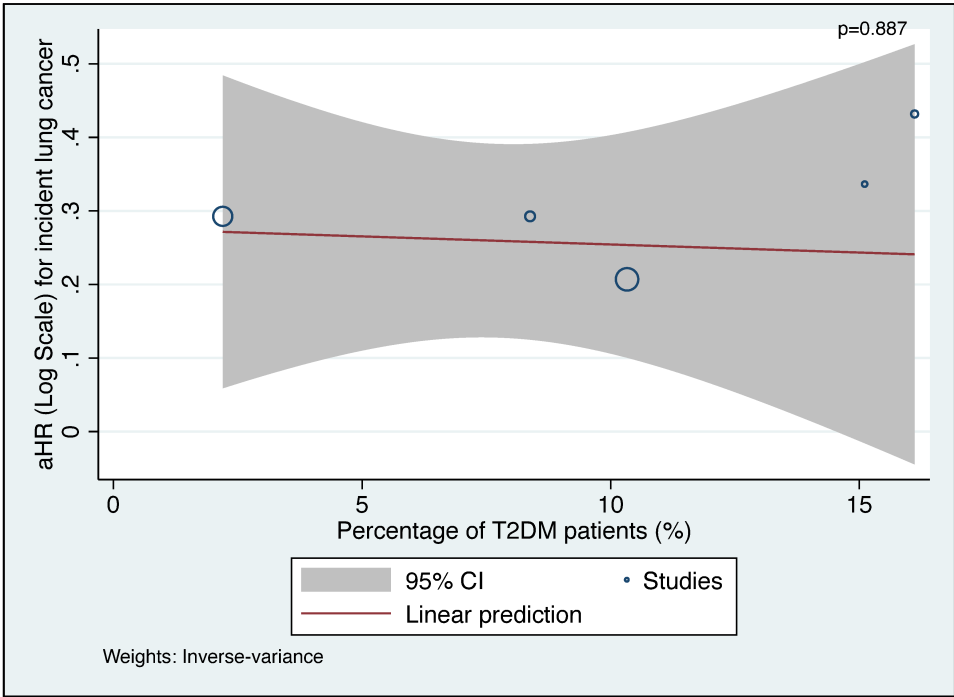

Panel E

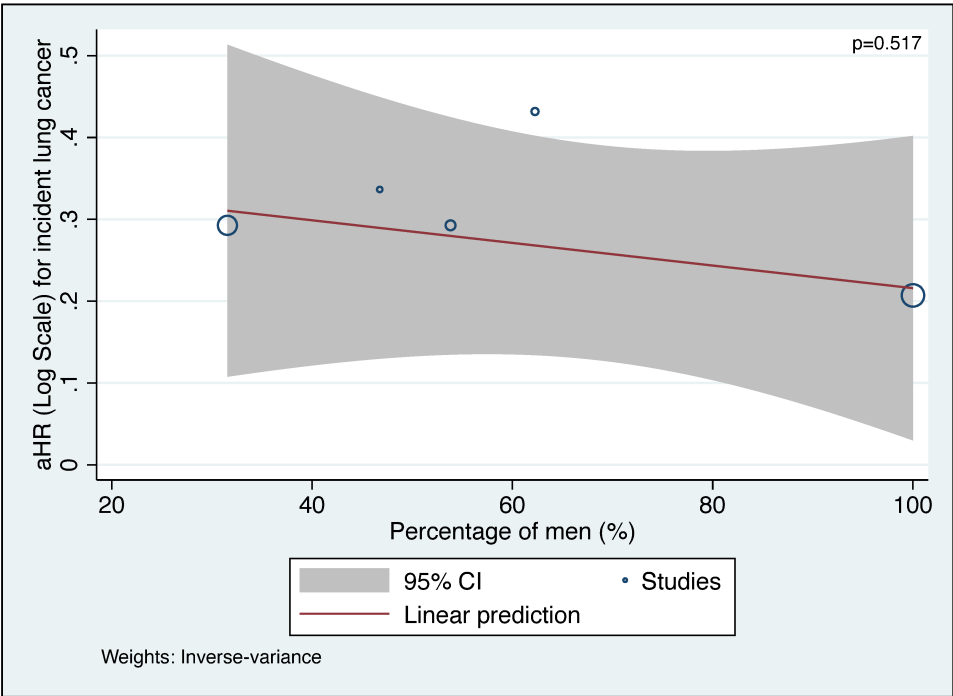

Supplement: inline-supplementary-material-10 [file inline-supplementary-material-10.pdf]
