# Supplementary material
Source: HighWire-hosted journal article supplement (https://gut.bmj.com/content/71/4/778)

Panel A – Lung cancer

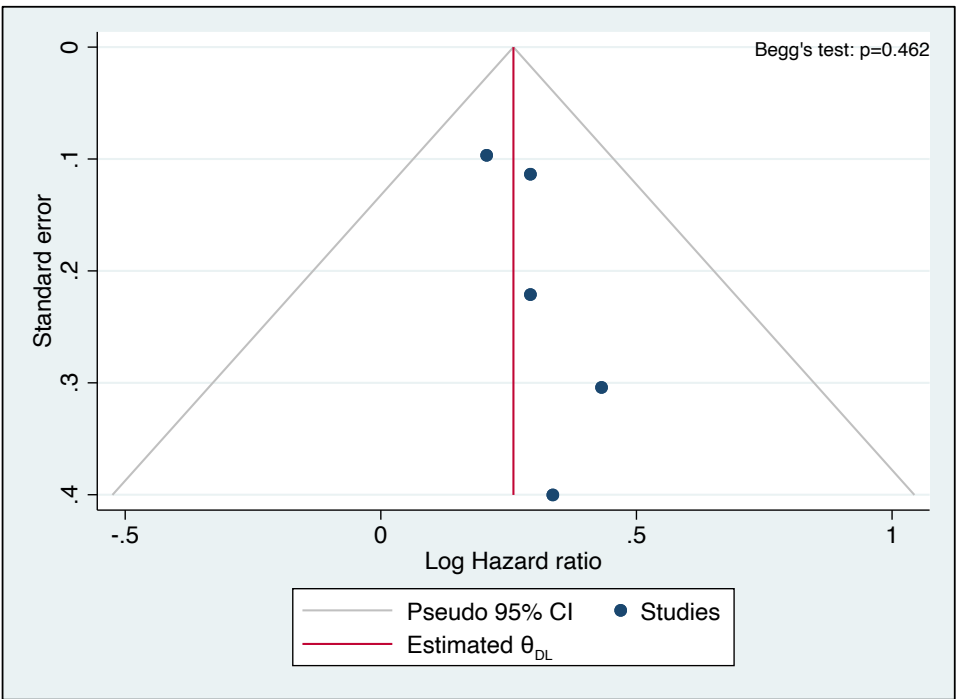

Panel B – Esophagus cancer

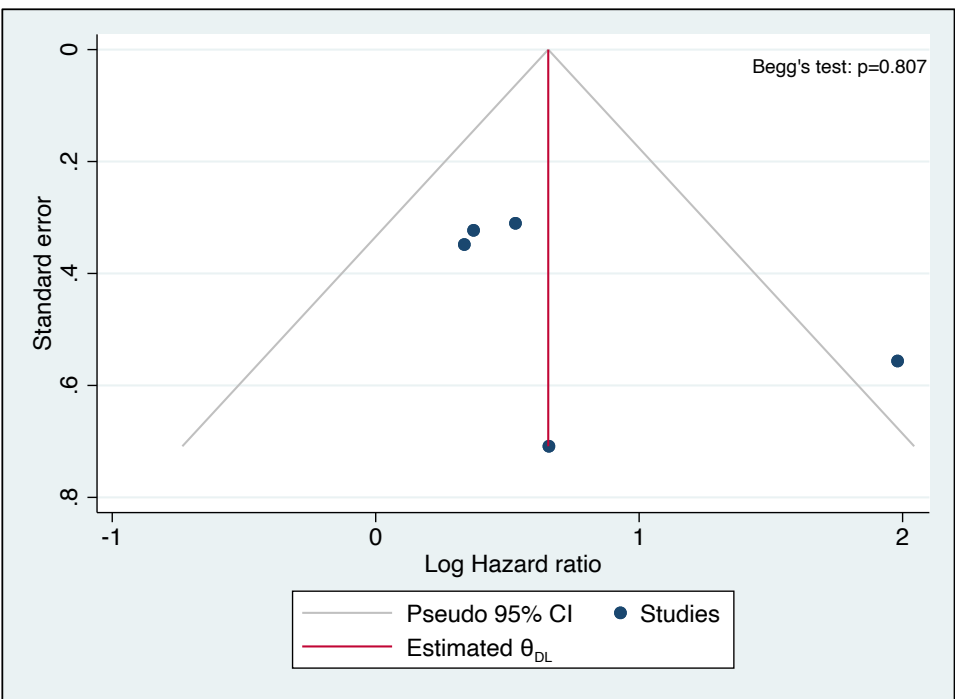

Panel C – Stomach cancer

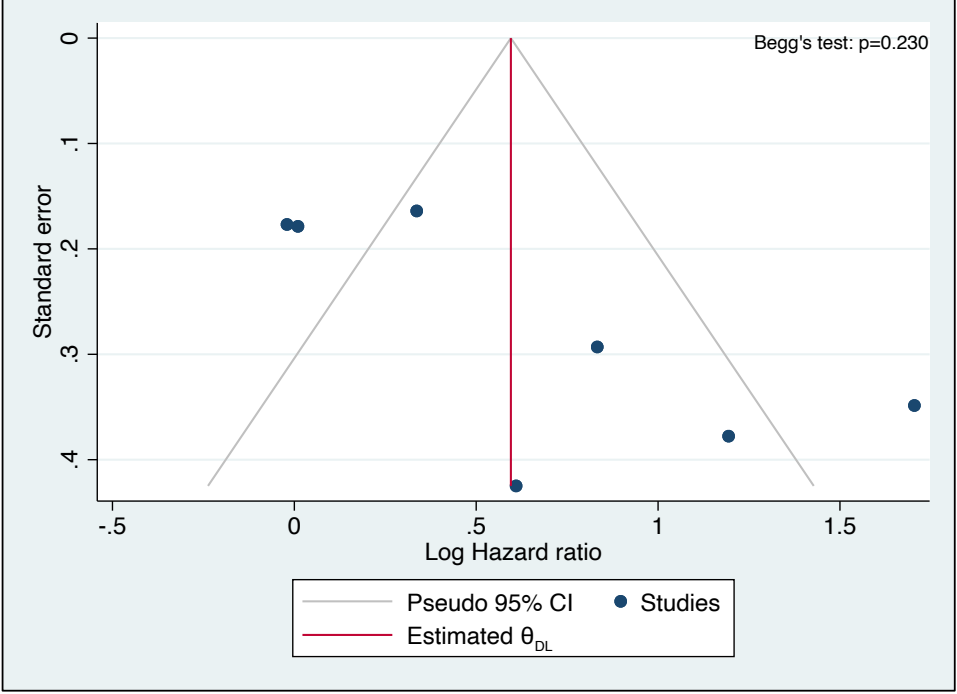

Panel D – Colorectal cancer

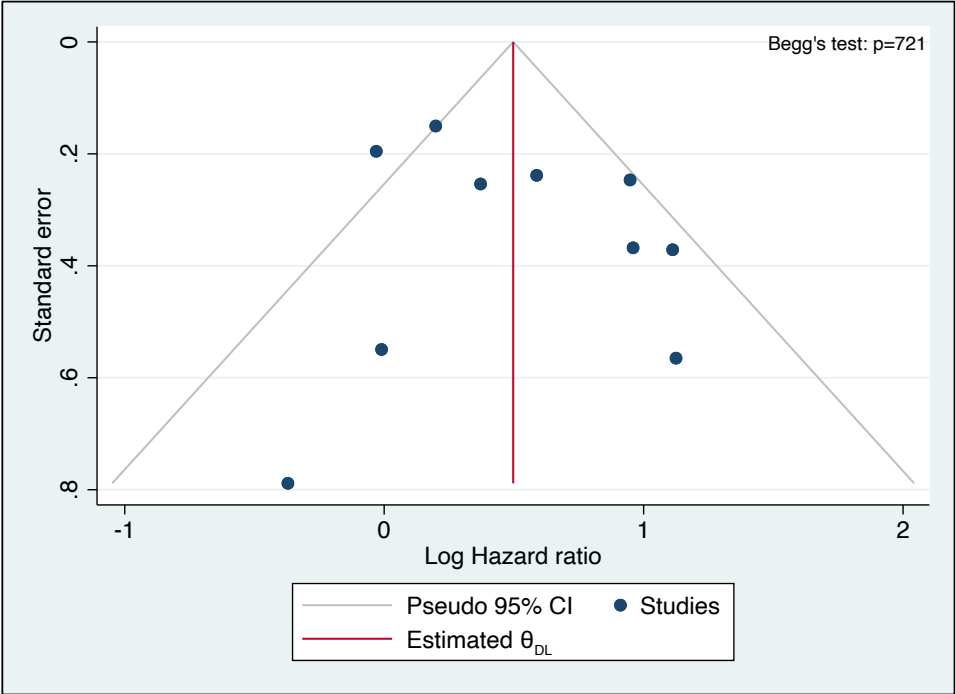

Panel E – Colon adenomas

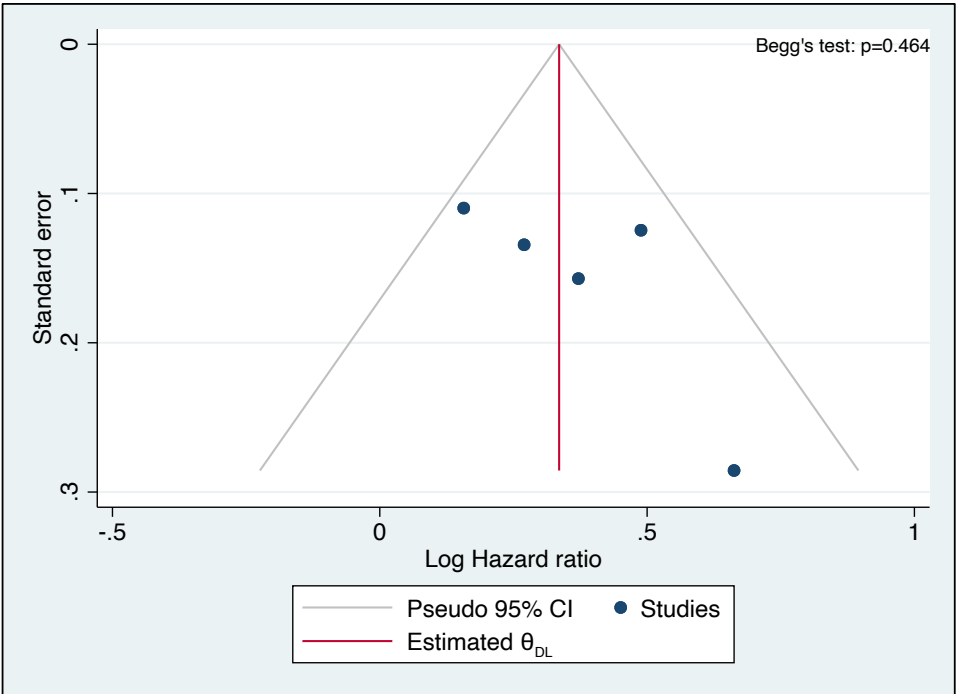

Panel F – Breast cancer

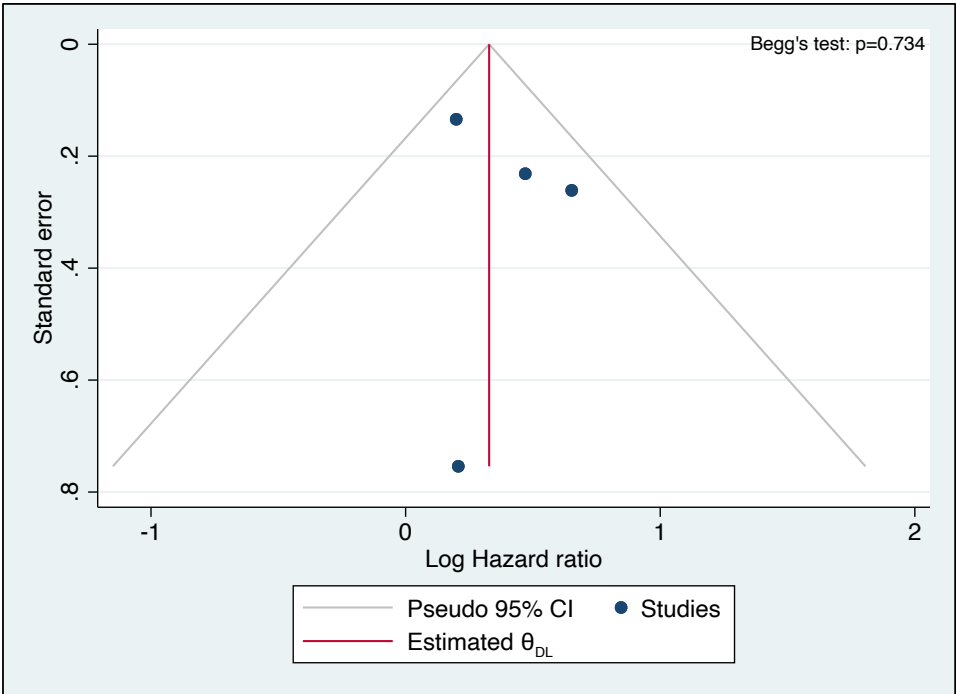

Panel G – Female genital organ cancer

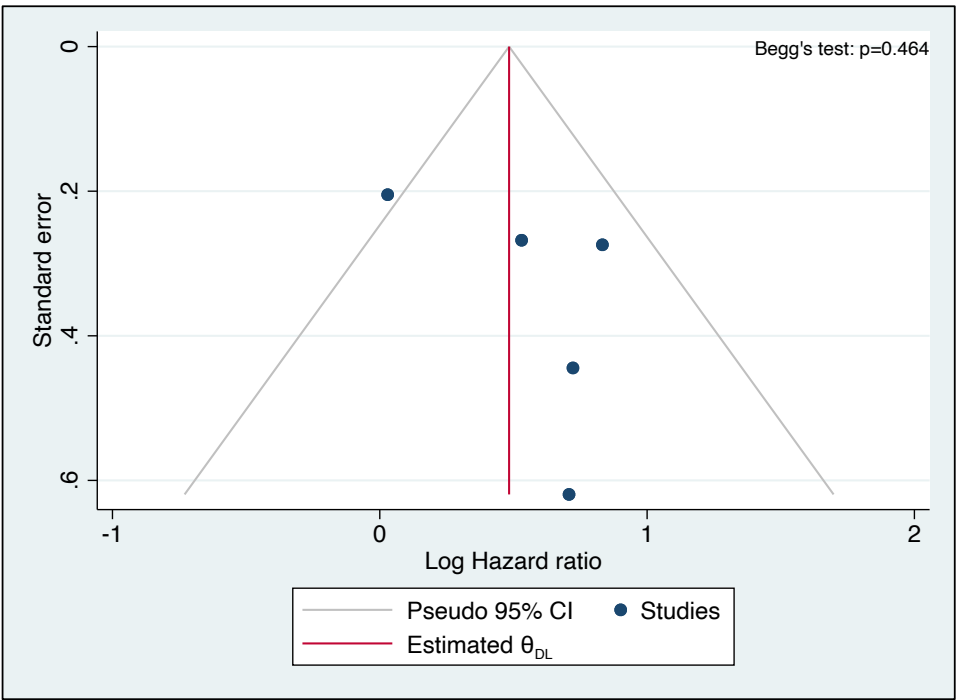

Panel H – Prostate cancer

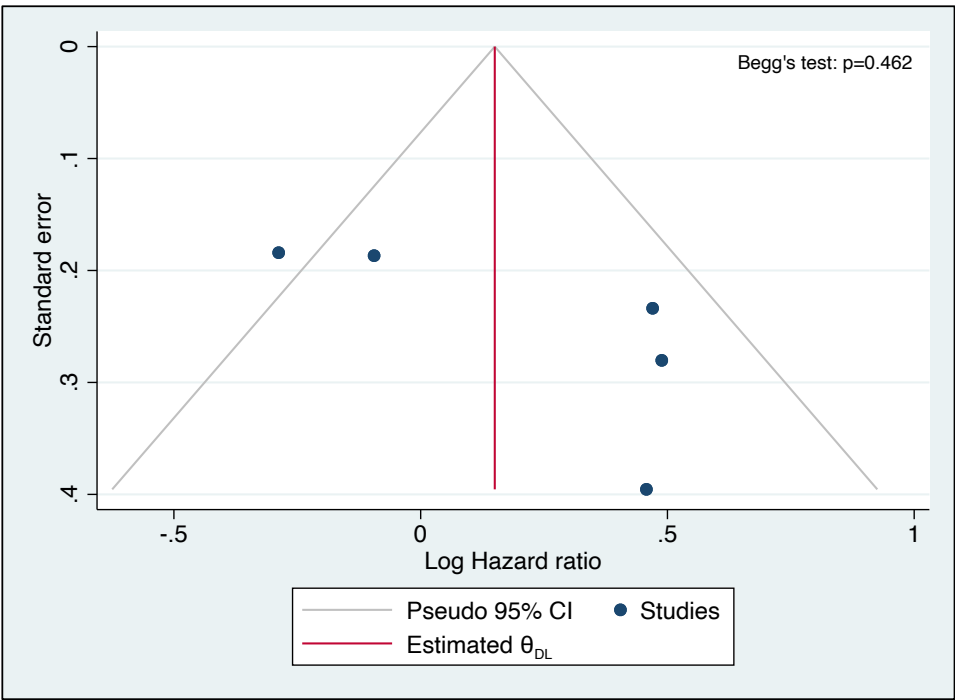

Panel I – Urinary system cancer

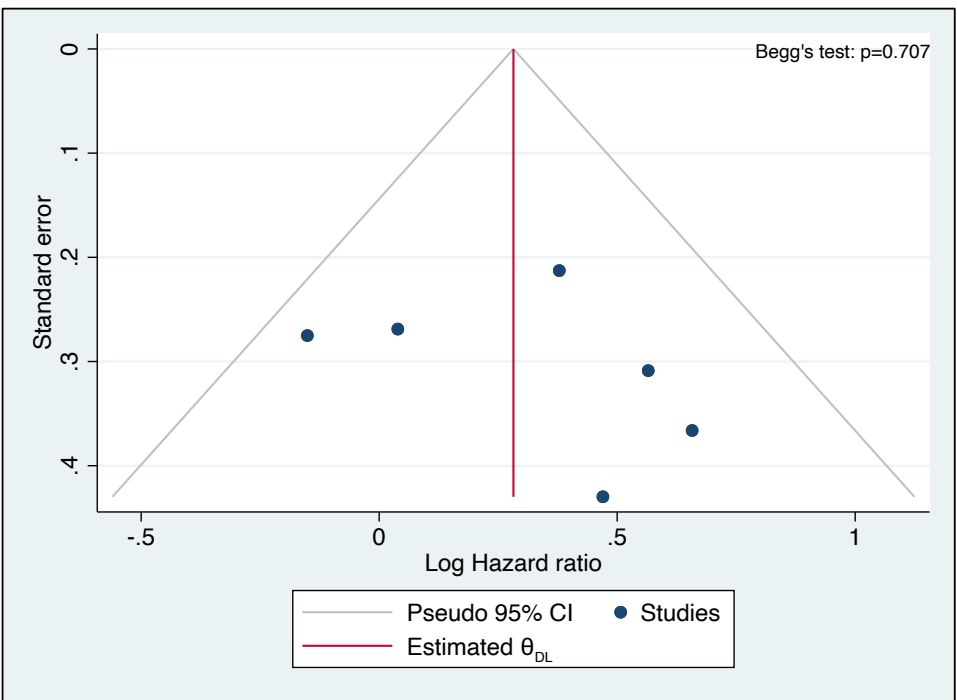

Supplement: inline-supplementary-material-15 [file inline-supplementary-material-15.pdf]
