# Supplementary material
Source: HighWire-hosted journal article supplement (https://gut.bmj.com/content/71/4/778)
Supplement: inline-supplementary-material-16 [file inline-supplementary-material-16.pdf]

Supplementary Table S5

The Egger’s regression test for evaluating the small-study effects on publication bias

Colorectal adenomas

|                                                                              |           |           |                         |       |                      |          |
|------------------------------------------------------------------------------|-----------|-----------|-------------------------|-------|----------------------|----------|
| <pre>. meta bias, egger random(dlaidr) tdistribution detail nometashow</pre> |           |           |                         |       |                      |          |
| Random-effects meta-regression                                               |           |           | Number of obs = 5       |       |                      |          |
| Method: DerSimonian-Laird                                                    |           |           | Residual heterogeneity: |       |                      |          |
|                                                                              |           |           | tau2 = .002398          |       |                      |          |
|                                                                              |           |           | I2 (%) = 11.86          |       |                      |          |
|                                                                              |           |           | H2 = 1.13               |       |                      |          |
|                                                                              |           |           | R-squared (%) = 73.00   |       |                      |          |
|                                                                              |           |           | Model F(1,3) = 2.11     |       |                      |          |
|                                                                              |           |           | Prob > F = 0.2426       |       |                      |          |
| _meta_es                                                                     | Coef.     | Std. Err. | t                       | P> t  | [95% Conf. Interval] |          |
| _meta_se                                                                     | 2.497228  | 1.720703  | 1.45                    | 0.243 | -2.978816            | 7.973272 |
| _cons                                                                        | -.0124525 | .2436167  | -0.05                   | 0.962 | -.7877497            | .7628447 |
| Test of residual homogeneity: Q_res = chi2(3) = 3.40 Prob > Q_res = 0.3335   |           |           |                         |       |                      |          |
| Regression-based Egger test for small-study effects                          |           |           |                         |       |                      |          |
| Random-effects model                                                         |           |           |                         |       |                      |          |
| Method: DerSimonian-Laird                                                    |           |           |                         |       |                      |          |
| H0: beta1 = 0; no small-study effects                                        |           |           |                         |       |                      |          |
| beta1 = 2.50                                                                 |           |           |                         |       |                      |          |
| SE of beta1 = 1.721                                                          |           |           |                         |       |                      |          |
| t = 1.45                                                                     |           |           |                         |       |                      |          |
| Prob >  t  = 0.2426                                                          |           |           |                         |       |                      |          |
| .                                                                            |           |           |                         |       |                      |          |
| end of do-file                                                               |           |           |                         |       |                      |          |

Colorectal cancer

|                                                                              |          |           |                         |       |                      |          |
|------------------------------------------------------------------------------|----------|-----------|-------------------------|-------|----------------------|----------|
| <pre>. meta bias, egger random(dlaidr) tdistribution detail nometashow</pre> |          |           |                         |       |                      |          |
| Random-effects meta-regression                                               |          |           | Number of obs = 10      |       |                      |          |
| Method: DerSimonian-Laird                                                    |          |           | Residual heterogeneity: |       |                      |          |
|                                                                              |          |           | tau2 = .1013            |       |                      |          |
|                                                                              |          |           | I2 (%) = 57.15          |       |                      |          |
|                                                                              |          |           | H2 = 2.33               |       |                      |          |
|                                                                              |          |           | R-squared (%) = 3.66    |       |                      |          |
|                                                                              |          |           | Model F(1,8) = 0.17     |       |                      |          |
|                                                                              |          |           | Prob > F = 0.6874       |       |                      |          |
| _meta_es                                                                     | Coef.    | Std. Err. | t                       | P> t  | [95% Conf. Interval] |          |
| _meta_se                                                                     | .4169481 | .9991091  | 0.42                    | 0.687 | -1.887002            | 2.720898 |
| _cons                                                                        | .3751732 | .324102   | 1.16                    | 0.280 | -.3722075            | 1.122554 |
| Test of residual homogeneity: Q_res = chi2(8) = 18.67 Prob > Q_res = 0.0167  |          |           |                         |       |                      |          |
| Regression-based Egger test for small-study effects                          |          |           |                         |       |                      |          |
| Random-effects model                                                         |          |           |                         |       |                      |          |
| Method: DerSimonian-Laird                                                    |          |           |                         |       |                      |          |
| H0: beta1 = 0; no small-study effects                                        |          |           |                         |       |                      |          |
| beta1 = 0.42                                                                 |          |           |                         |       |                      |          |
| SE of beta1 = 0.999                                                          |          |           |                         |       |                      |          |
| t = 0.42                                                                     |          |           |                         |       |                      |          |
| Prob >  t  = 0.6874                                                          |          |           |                         |       |                      |          |

Esophagus cancer

|                                                                            |           |           |                         |       |                      |          |
|----------------------------------------------------------------------------|-----------|-----------|-------------------------|-------|----------------------|----------|
| . meta bias, egger random(dlaidr) tdistribution detail nometashow          |           |           |                         |       |                      |          |
| Random-effects meta-regression                                             |           |           | Number of obs = 5       |       |                      |          |
| Method: DerSimonian-Laird                                                  |           |           | Residual heterogeneity: |       |                      |          |
|                                                                            |           |           | tau2 = .0688            |       |                      |          |
|                                                                            |           |           | I2 (%) = 32.93          |       |                      |          |
|                                                                            |           |           | H2 = 1.49               |       |                      |          |
|                                                                            |           |           | R-squared (%) = 47.62   |       |                      |          |
|                                                                            |           |           | Model F(1,3) = 2.08     |       |                      |          |
|                                                                            |           |           | Prob > F = 0.2446       |       |                      |          |
| _meta_es                                                                   | Coef.     | Std. Err. | t                       | P> t  | [95% Conf. Interval] |          |
| _meta_se                                                                   | 2.535247  | 1.75622   | 1.44                    | 0.245 | -3.053827            | 8.124322 |
| _cons                                                                      | -.3487442 | .7108633  | -0.49                   | 0.657 | -2.611028            | 1.91354  |
| Test of residual homogeneity: Q_res = chi2(3) = 4.47 Prob > Q_res = 0.2147 |           |           |                         |       |                      |          |
| Regression-based Egger test for small-study effects                        |           |           |                         |       |                      |          |
| Random-effects model                                                       |           |           |                         |       |                      |          |
| Method: DerSimonian-Laird                                                  |           |           |                         |       |                      |          |
| H0: beta1 = 0; no small-study effects                                      |           |           |                         |       |                      |          |
| beta1 = 2.54                                                               |           |           |                         |       |                      |          |
| SE of beta1 = 1.756                                                        |           |           |                         |       |                      |          |
| t = 1.44                                                                   |           |           |                         |       |                      |          |
| Prob >  t  = 0.2446                                                        |           |           |                         |       |                      |          |

Pancreas cancer

|                                                                            |          |           |                         |       |                      |          |
|----------------------------------------------------------------------------|----------|-----------|-------------------------|-------|----------------------|----------|
| . meta bias, egger random(dlaidr) tdistribution detail nometashow          |          |           |                         |       |                      |          |
| Random-effects meta-regression                                             |          |           | Number of obs = 3       |       |                      |          |
| Method: DerSimonian-Laird                                                  |          |           | Residual heterogeneity: |       |                      |          |
|                                                                            |          |           | tau2 = .1529            |       |                      |          |
|                                                                            |          |           | I2 (%) = 44.82          |       |                      |          |
|                                                                            |          |           | H2 = 1.81               |       |                      |          |
|                                                                            |          |           | R-squared (%) = 0.00    |       |                      |          |
|                                                                            |          |           | Model F(1,1) = 0.01     |       |                      |          |
|                                                                            |          |           | Prob > F = 0.9295       |       |                      |          |
| _meta_es                                                                   | Coef.    | Std. Err. | t                       | P> t  | [95% Conf. Interval] |          |
| _meta_se                                                                   | .3035442 | 2.729974  | 0.11                    | 0.930 | -34.38407            | 34.99115 |
| _cons                                                                      | .480452  | 1.068699  | 0.45                    | 0.731 | -13.09866            | 14.05956 |
| Test of residual homogeneity: Q_res = chi2(1) = 1.81 Prob > Q_res = 0.1782 |          |           |                         |       |                      |          |
| Regression-based Egger test for small-study effects                        |          |           |                         |       |                      |          |
| Random-effects model                                                       |          |           |                         |       |                      |          |
| Method: DerSimonian-Laird                                                  |          |           |                         |       |                      |          |
| H0: beta1 = 0; no small-study effects                                      |          |           |                         |       |                      |          |
| beta1 = 0.30                                                               |          |           |                         |       |                      |          |
| SE of beta1 = 2.730                                                        |          |           |                         |       |                      |          |
| t = 0.11                                                                   |          |           |                         |       |                      |          |
| Prob >  t  = 0.9295                                                        |          |           |                         |       |                      |          |

Breast cancer

|                                                                            |          |           |                         |       |                      |          |
|----------------------------------------------------------------------------|----------|-----------|-------------------------|-------|----------------------|----------|
| . meta bias, egger random(dlaid) tdistribution detail nometashow           |          |           |                         |       |                      |          |
| Random-effects meta-regression                                             |          |           | Number of obs =         |       | 4                    |          |
| Method: DerSimonian-Laird                                                  |          |           | Residual heterogeneity: |       |                      |          |
|                                                                            |          |           | tau2 =                  |       | .006499              |          |
|                                                                            |          |           | I2 (%) =                |       | 10.67                |          |
|                                                                            |          |           | H2 =                    |       | 1.12                 |          |
|                                                                            |          |           | R-squared (%) =         |       | 0.00                 |          |
|                                                                            |          |           | Model F(1,2) =          |       | 0.43                 |          |
|                                                                            |          |           | Prob > F =              |       | 0.5795               |          |
| _meta_es                                                                   | Coef.    | Std. Err. | t                       | P> t  | [95% Conf. Interval] |          |
| _meta_se                                                                   | .7443101 | 1.135587  | 0.66                    | 0.580 | -4.141727            | 5.630347 |
| _cons                                                                      | .1999778 | .2502364  | 0.80                    | 0.508 | -.8767025            | 1.276658 |
| Test of residual homogeneity: Q_res = chi2(2) = 2.24 Prob > Q_res = 0.3265 |          |           |                         |       |                      |          |
| Regression-based Egger test for small-study effects                        |          |           |                         |       |                      |          |
| Random-effects model                                                       |          |           |                         |       |                      |          |
| Method: DerSimonian-Laird                                                  |          |           |                         |       |                      |          |
| H0: betal = 0; no small-study effects                                      |          |           |                         |       |                      |          |
|                                                                            |          |           | betal =                 |       | 0.74                 |          |
|                                                                            |          |           | SE of betal =           |       | 1.136                |          |
|                                                                            |          |           | t =                     |       | 0.66                 |          |
|                                                                            |          |           | Prob >  t  =            |       | 0.5795               |          |

Female genital organ cancers

|                                                                            |           |           |                         |       |                      |          |
|----------------------------------------------------------------------------|-----------|-----------|-------------------------|-------|----------------------|----------|
| . meta bias, egger random(dlaid) tdistribution detail nometashow           |           |           |                         |       |                      |          |
| Random-effects meta-regression                                             |           |           | Number of obs =         |       | 5                    |          |
| Method: DerSimonian-Laird                                                  |           |           | Residual heterogeneity: |       |                      |          |
|                                                                            |           |           | tau2 =                  |       | .041                 |          |
|                                                                            |           |           | I2 (%) =                |       | 32.15                |          |
|                                                                            |           |           | H2 =                    |       | 1.47                 |          |
|                                                                            |           |           | R-squared (%) =         |       | 37.15                |          |
|                                                                            |           |           | Model F(1,3) =          |       | 1.22                 |          |
|                                                                            |           |           | Prob > F =              |       | 0.3507               |          |
| _meta_es                                                                   | Coef.     | Std. Err. | t                       | P> t  | [95% Conf. Interval] |          |
| _meta_se                                                                   | 1.644715  | 1.491795  | 1.10                    | 0.351 | -3.102844            | 6.392274 |
| _cons                                                                      | -.0105681 | .465961   | -0.02                   | 0.983 | -1.493464            | 1.472328 |
| Test of residual homogeneity: Q_res = chi2(3) = 4.42 Prob > Q_res = 0.2194 |           |           |                         |       |                      |          |
| Regression-based Egger test for small-study effects                        |           |           |                         |       |                      |          |
| Random-effects model                                                       |           |           |                         |       |                      |          |
| Method: DerSimonian-Laird                                                  |           |           |                         |       |                      |          |
| H0: betal = 0; no small-study effects                                      |           |           |                         |       |                      |          |
|                                                                            |           |           | betal =                 |       | 1.64                 |          |
|                                                                            |           |           | SE of betal =           |       | 1.492                |          |
|                                                                            |           |           | t =                     |       | 1.10                 |          |
|                                                                            |           |           | Prob >  t  =            |       | 0.3507               |          |

Lung cancer

|                                                                            |          |           |                         |       |                      |          |
|----------------------------------------------------------------------------|----------|-----------|-------------------------|-------|----------------------|----------|
| . meta bias, egger random(dlaidr) tdistribution detail nometashow          |          |           |                         |       |                      |          |
| Random-effects meta-regression                                             |          |           | Number of obs =         |       | 5                    |          |
| Method: DerSimonian-Laird                                                  |          |           | Residual heterogeneity: |       |                      |          |
|                                                                            |          |           | tau2 =                  |       | 0                    |          |
|                                                                            |          |           | I2 (%) =                |       | 0.00                 |          |
|                                                                            |          |           | H2 =                    |       | 1.00                 |          |
|                                                                            |          |           | R-squared (%) =         |       | 0.00                 |          |
|                                                                            |          |           | Model F(1,3) =          |       | 0.40                 |          |
|                                                                            |          |           | Prob > F =              |       | 0.5719               |          |
| _meta_es                                                                   | Coef.    | Std. Err. | t                       | P> t  | [95% Conf. Interval] |          |
| _meta_se                                                                   | .6054654 | .9571293  | 0.63                    | 0.572 | -2.440547            | 3.651478 |
| _cons                                                                      | .1790716 | .1436302  | 1.25                    | 0.301 | -.2780237            | .6361669 |
| Test of residual homogeneity: Q_res = chi2(3) = 0.36 Prob > Q_res = 0.9483 |          |           |                         |       |                      |          |
| Regression-based Egger test for small-study effects                        |          |           |                         |       |                      |          |
| Random-effects model                                                       |          |           |                         |       |                      |          |
| Method: DerSimonian-Laird                                                  |          |           |                         |       |                      |          |
| H0: betal = 0; no small-study effects                                      |          |           |                         |       |                      |          |
|                                                                            |          |           | betal =                 |       | 0.61                 |          |
|                                                                            |          |           | SE of betal =           |       | 0.957                |          |
|                                                                            |          |           | t =                     |       | 0.63                 |          |
|                                                                            |          |           | Prob >  t  =            |       | 0.5719               |          |

Prostate cancer

|                                                                            |           |           |                         |       |                      |          |
|----------------------------------------------------------------------------|-----------|-----------|-------------------------|-------|----------------------|----------|
| . meta bias, egger random(dlaidr) tdistribution detail nometashow          |           |           |                         |       |                      |          |
| Random-effects meta-regression                                             |           |           | Number of obs =         |       | 5                    |          |
| Method: DerSimonian-Laird                                                  |           |           | Residual heterogeneity: |       |                      |          |
|                                                                            |           |           | tau2 =                  |       | .02581               |          |
|                                                                            |           |           | I2 (%) =                |       | 33.85                |          |
|                                                                            |           |           | H2 =                    |       | 1.51                 |          |
|                                                                            |           |           | R-squared (%) =         |       | 72.02                |          |
|                                                                            |           |           | Model F(1,3) =          |       | 3.88                 |          |
|                                                                            |           |           | Prob > F =              |       | 0.1436               |          |
| _meta_es                                                                   | Coef.     | Std. Err. | t                       | P> t  | [95% Conf. Interval] |          |
| _meta_se                                                                   | 4.012935  | 2.038075  | 1.97                    | 0.144 | -2.47313             | 10.499   |
| _cons                                                                      | -.8102876 | .4845355  | -1.67                   | 0.193 | -2.352296            | .7317207 |
| Test of residual homogeneity: Q_res = chi2(3) = 4.54 Prob > Q_res = 0.2092 |           |           |                         |       |                      |          |
| Regression-based Egger test for small-study effects                        |           |           |                         |       |                      |          |
| Random-effects model                                                       |           |           |                         |       |                      |          |
| Method: DerSimonian-Laird                                                  |           |           |                         |       |                      |          |
| H0: betal = 0; no small-study effects                                      |           |           |                         |       |                      |          |
|                                                                            |           |           | betal =                 |       | 4.01                 |          |
|                                                                            |           |           | SE of betal =           |       | 2.038                |          |
|                                                                            |           |           | t =                     |       | 1.97                 |          |
|                                                                            |           |           | Prob >  t  =            |       | 0.1436               |          |

Urinary system cancers

|                                                                            |           |           |                         |       |                      |          |
|----------------------------------------------------------------------------|-----------|-----------|-------------------------|-------|----------------------|----------|
| . meta bias, egger random(dlaidr) tdistribution detail nometashow          |           |           |                         |       |                      |          |
| Random-effects meta-regression                                             |           |           | Number of obs =         |       | 6                    |          |
| Method: DerSimonian-Laird                                                  |           |           | Residual heterogeneity: |       |                      |          |
|                                                                            |           |           | tau2 =                  |       | .02214               |          |
|                                                                            |           |           | I2 (%) =                |       | 20.33                |          |
|                                                                            |           |           | H2 =                    |       | 1.26                 |          |
|                                                                            |           |           | R-squared (%) =         |       | 0.00                 |          |
|                                                                            |           |           | Model F(1,4) =          |       | 0.58                 |          |
|                                                                            |           |           | Prob > F =              |       | 0.4879               |          |
| _meta_es                                                                   | Coef.     | Std. Err. | t                       | P> t  | [95% Conf. Interval] |          |
| _meta_se                                                                   | 1.59263   | 2.087086  | 0.76                    | 0.488 | -4.20205             | 7.387309 |
| _cons                                                                      | -.1712342 | .6126359  | -0.28                   | 0.794 | -1.872184            | 1.529716 |
| Test of residual homogeneity: Q_res = chi2(4) = 5.02 Prob > Q_res = 0.2852 |           |           |                         |       |                      |          |
| Regression-based Egger test for small-study effects                        |           |           |                         |       |                      |          |
| Random-effects model                                                       |           |           |                         |       |                      |          |
| Method: DerSimonian-Laird                                                  |           |           |                         |       |                      |          |
| H0: betal = 0; no small-study effects                                      |           |           |                         |       |                      |          |
|                                                                            |           |           | betal =                 |       | 1.59                 |          |
|                                                                            |           |           | SE of betal =           |       | 2.087                |          |
|                                                                            |           |           | t =                     |       | 0.76                 |          |
|                                                                            |           |           | Prob >  t  =            |       | 0.4879               |          |

Stomach cancer

|                                                                             |           |           |                         |       |                      |          |
|-----------------------------------------------------------------------------|-----------|-----------|-------------------------|-------|----------------------|----------|
| . meta bias, egger random(dlaidr) tdistribution detail nometashow           |           |           |                         |       |                      |          |
| Random-effects meta-regression                                              |           |           | Number of obs =         |       | 7                    |          |
| Method: DerSimonian-Laird                                                   |           |           | Residual heterogeneity: |       |                      |          |
|                                                                             |           |           | tau2 =                  |       | .0697                |          |
|                                                                             |           |           | I2 (%) =                |       | 56.16                |          |
|                                                                             |           |           | H2 =                    |       | 2.28                 |          |
|                                                                             |           |           | R-squared (%) =         |       | 70.86                |          |
|                                                                             |           |           | Model F(1,5) =          |       | 9.79                 |          |
|                                                                             |           |           | Prob > F =              |       | 0.0260               |          |
| _meta_es                                                                    | Coef.     | Std. Err. | t                       | P> t  | [95% Conf. Interval] |          |
| _meta_se                                                                    | 4.714188  | 1.506917  | 3.13                    | 0.026 | .8405352             | 8.58784  |
| _cons                                                                       | -.6479812 | .3958745  | -1.64                   | 0.163 | -1.665609            | .3696466 |
| Test of residual homogeneity: Q_res = chi2(5) = 11.41 Prob > Q_res = 0.0439 |           |           |                         |       |                      |          |
| Regression-based Egger test for small-study effects                         |           |           |                         |       |                      |          |
| Random-effects model                                                        |           |           |                         |       |                      |          |
| Method: DerSimonian-Laird                                                   |           |           |                         |       |                      |          |
| H0: betal = 0; no small-study effects                                       |           |           |                         |       |                      |          |
|                                                                             |           |           | betal =                 |       | 4.71                 |          |
|                                                                             |           |           | SE of betal =           |       | 1.507                |          |
|                                                                             |           |           | t =                     |       | 3.13                 |          |
|                                                                             |           |           | Prob >  t  =            |       | 0.0260               |          |

***The non-parametric “trim-and-fill” analysis of publication bias for stomach cancer only (showing a significant small-study effect by the Egger’s test – see above)***

```
. meta trim , random(dlaidr) eform
```

Effect-size label: Effect Size  
Effect size: **log\_aHR**  
Std. Err.: **\_meta\_se**

Nonparametric trim-and-fill analysis of publication bias  
Linear estimator, imputing on the left

Iteration  
Number of studies = **7**  
Model: Random-effects observed = **7**  
Method: DerSimonian-Laird imputed = **0**

Pooling  
Model: Random-effects  
Method: DerSimonian-Laird

| Studies            | exp(ES)      | [95% Conf. Interval] |              |
|--------------------|--------------|----------------------|--------------|
| Observed           | <b>1.814</b> | <b>1.194</b>         | <b>2.755</b> |
| Observed + Imputed | <b>1.814</b> | <b>1.194</b>         | <b>2.755</b> |
